# Supplementary material for: Titanomagnetite, a new potential geochronometer for in situ U–Pb dating
Source: Royal Society of Chemistry journal article supplement (doi:10.1039/d4ja00254g), 2024-01-01
Supplement: d4ja00254g2.pdf [file d4ja00254g2.pdf]

Table S-3 LA-SF-ICP-MS U–Pb analytical results of titanomagnetite sample HG79c in different ablation settings

| Sample No.        |            | Pb    | Th   | U    | 207Pb/235U |            | 206Pb/238U |            | rho   | Note |
|-------------------|------------|-------|------|------|------------|------------|------------|------------|-------|------|
|                   |            | Total | 232  | 238  | Ratio      | 2 $\sigma$ | Ratio      | 2 $\sigma$ |       |      |
|                   |            | ppm   | ppm  | ppm  |            |            |            |            |       |      |
| 44 $\mu$ m-3J-8Hz |            |       |      |      |            |            |            |            |       |      |
| 2023707a10        | HG79-44-01 | 0.05  | 0.03 | 0.09 | 15.0417    | 1.9868     | 0.1675     | 0.0190     | 0.858 |      |
| 2023707a11        | HG79-44-02 | 0.03  | 0.01 | 0.03 | 38.3725    | 6.9619     | 0.3582     | 0.0632     | 0.972 |      |
| 2023707a12        | HG79-44-03 | 0.08  | 0.03 | 0.08 | 33.9152    | 3.2156     | 0.3292     | 0.0353     | 0.990 |      |
| 2023707a13        | HG79-44-04 | 0.05  | 0.01 | 0.06 | 23.4130    | 2.1899     | 0.2410     | 0.0194     | 0.857 |      |
| 2023707a14        | HG79-44-05 | 0.07  | 0.02 | 0.10 | 19.9680    | 1.6326     | 0.2102     | 0.0167     | 0.968 |      |
| 2023707a15        | HG79-44-06 | 0.16  | 0.03 | 0.20 | 7.5443     | 0.7998     | 0.1047     | 0.0111     | 0.990 |      |
| 2023707a16        | HG79-44-07 | 0.02  | 0.00 | 0.01 | 67.8923    | 14.9940    | 0.6051     | 0.1482     | 0.990 |      |
| 2023707a18        | HG79-44-09 | 0.02  | 0.00 | 0.02 | 31.4618    | 6.1358     | 0.3043     | 0.0695     | 0.990 |      |
| 2023707a19        | HG79-44-10 | 0.06  | 0.03 | 0.07 | 22.2785    | 2.3294     | 0.2227     | 0.0157     | 0.665 |      |
| 2023707a20        | HG79-44-11 | 0.08  | 0.07 | 0.19 | 14.2522    | 1.8685     | 0.1601     | 0.0166     | 0.786 |      |
| 2023707a21        | HG79-44-12 | 0.07  | 0.06 | 0.19 | 9.1838     | 0.9189     | 0.1176     | 0.0090     | 0.763 |      |
| 2023707a22        | HG79-44-13 | 0.16  | 0.23 | 0.26 | 18.7596    | 2.1334     | 0.1934     | 0.0148     | 0.665 |      |
| 2023707a23        | HG79-44-14 | 0.11  | 0.14 | 0.47 | 4.6491     | 0.4893     | 0.0763     | 0.0034     | 0.404 |      |
| 2023707a24        | HG79-44-15 | 0.11  | 0.05 | 0.22 | 14.6590    | 1.5872     | 0.1670     | 0.0089     | 0.479 |      |
| 2023707a25        | HG79-44-16 | 0.08  | 0.05 | 0.19 | 11.6997    | 1.2554     | 0.1401     | 0.0099     | 0.652 |      |
| 2023707a33        | HG79-44-17 | 0.17  | 0.16 | 0.47 | 129.2587   | 52.5637    | 1.1379     | 0.4005     | 0.865 |      |
| 2023707a34        | HG79-44-18 | 0.09  | 0.11 | 0.20 | 12.4522    | 1.3401     | 0.1428     | 0.0107     | 0.688 |      |
| 2023707a35        | HG79-44-19 | 0.12  | 0.12 | 0.22 | 15.5501    | 1.6686     | 0.1663     | 0.0139     | 0.776 |      |
| 2023707a36        | HG79-44-20 | 0.18  | 0.18 | 0.11 | 56.1694    | 6.2378     | 0.4967     | 0.0366     | 0.656 |      |
| 2023707a37        | HG79-44-21 | 0.15  | 0.17 | 0.30 | 13.8931    | 1.2624     | 0.1556     | 0.0101     | 0.707 |      |
| 2023707a38        | HG79-44-22 | 0.08  | 0.09 | 0.14 | 15.2607    | 1.5406     | 0.1672     | 0.0124     | 0.728 |      |
| 2023707a39        | HG79-44-23 | 0.09  | 0.17 | 0.19 | 12.0684    | 1.1946     | 0.1410     | 0.0101     | 0.719 |      |
| 2023707a40        | HG79-44-24 | 0.07  | 0.05 | 0.06 | 52.7272    | 10.3056    | 0.4816     | 0.0750     | 0.795 |      |
| 2023707a41        | HG79-44-25 | 0.05  | 0.01 | 0.06 | 28.5155    | 4.8345     | 0.2826     | 0.0369     | 0.768 |      |
| 2023707a42        | HG79-44-26 | 0.07  | 0.03 | 0.13 | 14.6221    | 1.5121     | 0.1583     | 0.0130     | 0.791 |      |
| 2023707a43        | HG79-44-27 | 0.06  | 0.04 | 0.12 | 15.8130    | 1.9558     | 0.1738     | 0.0202     | 0.938 |      |
| 2023707a44        | HG79-44-28 | 0.84  | 0.03 | 0.09 | 14.3136    | 1.4528     | 0.1598     | 0.0155     | 0.956 |      |
| 2023707a45        | HG79-44-29 | 0.09  | 0.06 | 0.11 | 22.5408    | 2.0214     | 0.2261     | 0.0181     | 0.888 |      |
| 2023707a46        | HG79-44-30 | 0.09  | 0.05 | 0.16 | 14.1493    | 1.1043     | 0.1566     | 0.0106     | 0.866 |      |
| 2023707a50        | HG79-44-31 | 0.07  | 0.01 | 0.04 | 56.6211    | 6.5455     | 0.5313     | 0.0648     | 0.990 |      |
| 2023707a51        | HG79-44-32 | 0.06  | 0.02 | 0.08 | 24.5128    | 1.9038     | 0.2438     | 0.0177     | 0.931 |      |
| 2023707a52        | HG79-44-33 | 0.06  | 0.06 | 0.07 | 20.6859    | 2.1090     | 0.2246     | 0.0180     | 0.781 |      |
| 2023707a53        | HG79-44-34 | 0.15  | 0.12 | 0.26 | 15.6975    | 0.8459     | 0.1740     | 0.0096     | 0.990 |      |
| 2023707a54        | HG79-44-35 | 0.12  | 0.13 | 0.24 | 18.2002    | 2.5946     | 0.1939     | 0.0200     | 0.718 |      |
| 2023707a55        | HG79-44-36 | 0.12  | 0.11 | 0.26 | 13.3033    | 0.9815     | 0.1524     | 0.0101     | 0.895 |      |

Continued Table S-3

| Sample No.        |           | Pb    | Th   | U    | 207Pb/235U |            | 206Pb/238U |            | rho   | Note |
|-------------------|-----------|-------|------|------|------------|------------|------------|------------|-------|------|
|                   |           | Total | 232  | 238  | Ratio      | 2 $\sigma$ | Ratio      | 2 $\sigma$ |       |      |
|                   |           | ppm   | ppm  | ppm  |            |            |            |            |       |      |
| 60 $\mu$ m-3J-8Hz |           |       |      |      |            |            |            |            |       |      |
| 20230403B8        | 79-MAG-01 | 0.02  | 0.00 | 0.03 | 90.7870    | 36.4676    | 0.7447     | 0.2118     | 0.707 |      |
| 20230403B9        | 79-MAG-02 | 0.26  | 0.10 | 0.35 | 27.5936    | 1.7010     | 0.2649     | 0.0155     | 0.947 |      |
| 20230403B10       | 79-MAG-03 | 0.21  | 0.11 | 0.86 | 7.8502     | 0.4087     | 0.1008     | 0.0039     | 0.725 |      |
| 20230403B11       | 79-MAG-04 | 0.25  | 0.07 | 0.68 | 13.7556    | 0.7148     | 0.1469     | 0.0064     | 0.824 |      |
| 20230403B12       | 79-MAG-05 | 0.17  | 0.00 | 0.32 | 25.2916    | 2.5530     | 0.2485     | 0.0234     | 0.933 |      |
| 20230403B13       | 79-MAG-06 | 0.28  | 1.28 | 0.08 | 74.3307    | 9.7891     | 0.6499     | 0.0837     | 0.978 |      |
| 20230403B14       | 79-MAG-07 | 0.23  | 0.01 | 0.20 | 60.8798    | 7.7639     | 0.5416     | 0.0640     | 0.925 |      |
| 20230403B15       | 79-MAG-08 | 0.38  | 0.03 | 1.55 | 8.1832     | 0.4794     | 0.1027     | 0.0040     | 0.642 |      |
| 20230403B16       | 79-MAG-09 | 0.25  | 0.01 | 0.49 | 20.9160    | 1.4948     | 0.2093     | 0.0172     | 0.990 |      |
| 20230403B17       | 79-MAG-10 | 0.86  | 0.07 | 1.54 | 17.7917    | 1.1895     | 0.1876     | 0.0085     | 0.654 |      |
| 20230403B18       | 79-MAG-11 | 0.37  | 0.09 | 1.65 | 8.6965     | 0.4915     | 0.1062     | 0.0035     | 0.534 |      |
| 20230403B19       | 79-MAG-12 | 0.41  | 0.05 | 1.14 | 11.8925    | 0.7255     | 0.1306     | 0.0047     | 0.551 |      |
| 20230403B20       | 79-MAG-13 | 0.56  | 0.02 | 0.30 | 80.8335    | 7.1932     | 0.6711     | 0.0501     | 0.834 |      |
| 20230403B21       | 79-MAG-14 | 0.14  | 0.01 | 0.06 | 67.8611    | 9.0401     | 0.5854     | 0.0748     | 0.958 |      |
| 20230403B33       | 79-MGT-19 | 0.38  | 0.02 | 0.09 | 142.9239   | 24.6891    | 1.2178     | 0.2034     | 0.966 |      |
| 20230403B34       | 79-MGT-20 | 0.16  | 0.04 | 0.50 | 9.5981     | 0.5711     | 0.1137     | 0.0050     | 0.716 |      |
| 20230403B35       | 79-MGT-21 | 0.22  | 0.08 | 1.14 | 10.7438    | 0.5748     | 0.1207     | 0.0037     | 0.526 |      |
| 20230403B37       | 79-MGT-23 | 0.22  | 0.07 | 0.17 | 46.4721    | 2.9123     | 0.4054     | 0.0245     | 0.963 |      |
| 20230403B38       | 79-MGT-24 | 0.12  | 0.22 | 0.15 | 31.6158    | 1.9003     | 0.3061     | 0.0200     | 0.990 |      |
| 20230403B39       | 79-MGT-25 | 0.25  | 0.12 | 0.16 | 44.8960    | 3.1802     | 0.4185     | 0.0212     | 0.699 |      |
| 20230403B41       | 79-MGT-27 | 0.25  | 0.07 | 0.16 | 54.6666    | 2.7906     | 0.4849     | 0.0238     | 0.955 |      |
| 20230403B42       | 79-MGT-28 | 0.11  | 0.04 | 0.08 | 56.5849    | 6.3562     | 0.4816     | 0.0389     | 0.713 |      |
| 20230403B43       | 79-MGT-29 | 0.35  | 0.19 | 0.32 | 41.3375    | 2.1038     | 0.3676     | 0.0170     | 0.898 |      |
| 20230403B44       | 79-MGT-30 | 0.33  | 0.12 | 0.26 | 44.7666    | 2.0016     | 0.4130     | 0.0173     | 0.925 |      |
| 20230403B52       | 79-MGT-31 | 0.29  | 0.16 | 0.31 | 36.2809    | 1.9337     | 0.3434     | 0.0228     | 0.990 |      |
| 20230403B53       | 79-MGT-32 | 2.57  | 0.20 | 0.32 | 363.4892   | 65.5791    | 3.0710     | 0.5534     | 0.999 |      |
| 20230403B55       | 79-MGT-34 | 0.28  | 0.03 | 0.16 | 39.8084    | 3.6666     | 0.3777     | 0.0323     | 0.925 |      |
| 20230403B56       | 79-MGT-35 | 0.31  | 0.85 | 0.40 | 33.9844    | 2.9586     | 0.3104     | 0.0237     | 0.871 |      |
| 20230403B57       | 79-MGT-36 | 0.19  | 0.02 | 0.08 | 88.0821    | 5.6077     | 0.7509     | 0.0480     | 0.990 |      |
| 20230403B58       | 79-MGT-37 | 0.40  | 0.12 | 0.39 | 41.7029    | 2.3196     | 0.3872     | 0.0195     | 0.895 |      |
| 20230403B59       | 79-MGT-38 | 0.41  | 0.15 | 0.54 | 28.0998    | 1.2367     | 0.2750     | 0.0105     | 0.853 |      |
| 20230403B60       | 79-MGT-39 | 0.41  | 0.48 | 0.49 | 30.8870    | 1.7044     | 0.2911     | 0.0136     | 0.831 |      |
| 20230403B61       | 79-MGT-40 | 0.35  | 0.15 | 0.18 | 51.9633    | 3.4829     | 0.4705     | 0.0307     | 0.970 |      |
| 20230403B62       | 79-MGT-41 | 0.21  | 0.03 | 0.10 | 65.5963    | 4.5405     | 0.5688     | 0.0345     | 0.870 |      |
| 20230403B63       | 79-MGT-42 | 0.34  | 0.04 | 0.80 | 15.8114    | 0.8164     | 0.1733     | 0.0071     | 0.777 |      |
| 20230403B64       | 79-MGT-43 | 0.47  | 0.55 | 1.02 | 16.1070    | 0.7327     | 0.1738     | 0.0059     | 0.709 |      |
| 20230403B65       | 79-MGT-44 | 0.26  | 0.03 | 0.64 | 14.5717    | 0.7463     | 0.1584     | 0.0055     | 0.635 |      |

Continued Table S-3

| Sample No.        |            | Pb    | Th    | U    | 207Pb/235U |            | 206Pb/238U |            | rho   | Note                     |
|-------------------|------------|-------|-------|------|------------|------------|------------|------------|-------|--------------------------|
|                   |            | Total | 232   | 238  | Ratio      | 2 $\sigma$ | Ratio      | 2 $\sigma$ |       |                          |
|                   |            | ppm   | ppm   | ppm  |            |            |            |            |       |                          |
| 60 $\mu$ m-3J-8Hz |            |       |       |      |            |            |            |            |       |                          |
| 20230403B66       | 79-MGT-45  | 1.35  | 0.65  | 0.70 | 79.6079    | 7.4340     | 0.6764     | 0.0459     | 0.717 |                          |
| 20230403B67       | 79-MGT-46  | 0.15  | 0.00  | 0.13 | 54.4262    | 4.8475     | 0.4793     | 0.0368     | 0.857 |                          |
| 20230403B77       | 79-MGT-48  | 0.10  | 0.09  | 0.06 | 53.0499    | 5.4310     | 0.4668     | 0.0541     | 0.990 |                          |
| 20230403B78       | 79-MGT-49  | 0.06  | 0.01  | 0.04 | 46.9862    | 7.6023     | 0.4134     | 0.0830     | 0.990 |                          |
| 20230403B81       | 79-MGT-52  | 0.25  | 0.41  | 0.39 | 36.7790    | 3.5258     | 0.3543     | 0.0406     | 0.990 |                          |
| 60 $\mu$ m-4J-6Hz |            |       |       |      |            |            |            |            |       |                          |
| 20240412A5        | HG79-TF-01 | 0.11  | 0.06  | 0.16 | 19.6275    | 1.4633     | 0.2061     | 0.0164     | 0.990 | <input type="checkbox"/> |
| 20240412A6        | HG79-TF-02 | 0.12  | 0.21  | 0.22 | 11.1268    | 1.1331     | 0.1340     | 0.0133     | 0.972 | <input type="checkbox"/> |
| 20240412A7        | HG79-TF-03 | 0.06  | 0.06  | 0.08 | 21.0202    | 1.9838     | 0.2165     | 0.0216     | 0.990 | <input type="checkbox"/> |
| 20240412A8        | HG79-TF-04 | 0.04  | 0.01  | 0.04 | 19.4377    | 3.1778     | 0.2036     | 0.0395     | 0.990 | <input type="checkbox"/> |
| 20240412A10       | HG79-TF-05 | 0.09  | 0.06  | 0.17 | 13.3759    | 0.8994     | 0.1529     | 0.0126     | 0.990 | <input type="checkbox"/> |
| 20240412A18       | HG79-TF-06 | 1.35  | 15.81 | 5.26 | 6.7663     | 0.4969     | 0.0969     | 0.0055     | 0.708 | abnormal contents        |
| 20240412A19       | HG79-TF-07 | 0.49  | 0.23  | 0.32 | 20.7810    | 1.3083     | 0.2128     | 0.0125     | 0.910 | <input type="checkbox"/> |
| 20240412A20       | HG79-TF-08 | 0.24  | 0.33  | 0.21 | 36.1918    | 2.8360     | 0.3546     | 0.0275     | 0.988 | <input type="checkbox"/> |
| 20240412A21       | HG79-TF-09 | 0.27  | 0.13  | 0.36 | 21.5984    | 1.2727     | 0.2244     | 0.0134     | 0.990 | <input type="checkbox"/> |
| 20240412A22       | HG79-TF-10 | 0.10  | 0.05  | 0.12 | 26.4791    | 2.1349     | 0.2668     | 0.0247     | 0.990 | <input type="checkbox"/> |
| 20240412A23       | HG79-TF-11 | 0.18  | 0.08  | 0.22 | 22.7054    | 2.1644     | 0.2281     | 0.0189     | 0.853 | <input type="checkbox"/> |
| 20240412A34       | HG79-TF-12 | 0.13  | 0.07  | 0.18 | 22.6599    | 1.6015     | 0.2316     | 0.0201     | 0.990 | <input type="checkbox"/> |
| 20240412A36       | HG79-TF-14 | 0.46  | 0.30  | 0.55 | 24.8775    | 1.1061     | 0.2513     | 0.0118     | 0.990 | <input type="checkbox"/> |
| 20240412A37       | HG79-TF-15 | 0.34  | 0.16  | 0.35 | 28.8818    | 1.4468     | 0.2894     | 0.0147     | 0.990 | <input type="checkbox"/> |
| 20240412A38       | HG79-TF-16 | 0.24  | 0.09  | 0.21 | 33.5948    | 2.2191     | 0.3277     | 0.0236     | 0.990 | <input type="checkbox"/> |
| 20240412A39       | HG79-TF-17 | 0.26  | 0.07  | 0.24 | 31.4082    | 1.7552     | 0.3099     | 0.0189     | 0.990 | <input type="checkbox"/> |
| 20240412A41       | HG79-TF-19 | 0.25  | 0.02  | 0.27 | 28.3754    | 1.5575     | 0.2822     | 0.0151     | 0.959 | <input type="checkbox"/> |
| 20240412A42       | HG79-TF-20 | 0.14  | 0.02  | 0.87 | 4.8783     | 0.5622     | 0.0809     | 0.0102     | 0.990 | <input type="checkbox"/> |
| 20240412A43       | HG79-TF-21 | 0.07  | 0.02  | 0.65 | 3.1444     | 0.4981     | 0.0654     | 0.0103     | 0.993 | <input type="checkbox"/> |
| 20240412A44       | HG79-TF-22 | 0.13  | 0.16  | 0.45 | 9.5361     | 1.2028     | 0.1192     | 0.0189     | 0.990 | <input type="checkbox"/> |
| 20240412A45       | HG79-TF-23 | 0.11  | 0.02  | 0.24 | 11.8546    | 0.7606     | 0.1402     | 0.0091     | 0.990 | <input type="checkbox"/> |
| 20240412A46       | HG79-TF-24 | 0.10  | 0.01  | 0.13 | 13.4190    | 1.4768     | 0.1536     | 0.0178     | 0.990 | <input type="checkbox"/> |
| 20240412A47       | HG79-TF-25 | 0.02  | 0.00  | 0.04 | 10.1537    | 3.1521     | 0.1287     | 0.0563     | 0.990 | <input type="checkbox"/> |
| 20240412A77       | HG79-TF-27 | 0.07  | 0.02  | 0.06 | 33.1165    | 3.4405     | 0.3292     | 0.0427     | 0.990 | <input type="checkbox"/> |
| 20240412A78       | HG79-TF-28 | 0.11  | 0.04  | 0.14 | 16.6443    | 1.4444     | 0.1822     | 0.0167     | 0.990 | <input type="checkbox"/> |
| 20240412A79       | HG79-TF-29 | 0.04  | 0.00  | 0.03 | 26.3981    | 5.3371     | 0.2698     | 0.0661     | 0.990 | <input type="checkbox"/> |
| 20240412A80       | HG79-TF-30 | 0.04  | 0.02  | 0.04 | 22.3552    | 2.8830     | 0.2277     | 0.0412     | 0.990 | <input type="checkbox"/> |
| 20240412A81       | HG79-TF-31 | 0.09  | 0.06  | 0.15 | 15.8172    | 1.3831     | 0.1731     | 0.0122     | 0.774 | <input type="checkbox"/> |
| 20240412A82       | HG79-TF-32 | 0.05  | 0.01  | 0.15 | 8.2774     | 1.0138     | 0.1106     | 0.0146     | 0.990 | <input type="checkbox"/> |
| 20240412A83       | HG79-TF-33 | 0.02  | 0.00  | 0.03 | 22.9662    | 4.1263     | 0.2365     | 0.0470     | 0.990 | <input type="checkbox"/> |

Continued Table S-3

| Sample No.         |         | Pb    | Th   | U    | 207Pb/235U |            | 206Pb/238U |            | rho   | Note |
|--------------------|---------|-------|------|------|------------|------------|------------|------------|-------|------|
|                    |         | Total | 232  | 238  | Ratio      | 2 $\sigma$ | Ratio      | 2 $\sigma$ |       |      |
|                    |         | ppm   | ppm  | ppm  |            |            |            |            |       |      |
| 60 $\mu$ m-4J-10Hz |         |       |      |      |            |            |            |            |       |      |
| 20221024a15        | 79-2-01 | 0.04  | 0.01 | 0.03 | 67.4290    | 8.7266     | 0.5782     | 0.0648     | 0.857 |      |
| 20221024a16        | 79-2-02 | 0.06  | 0.01 | 0.04 | 75.2904    | 10.1777    | 0.6399     | 0.0947     | 0.999 |      |
| 20221024a17        | 79-2-03 | 0.03  | 0.00 | 0.02 | 18.5593    | 2.9972     | 0.1854     | 0.0274     | 0.911 |      |
| 20221024a18        | 79-2-04 | 0.03  | 0.00 | 0.03 | 29.1434    | 4.5863     | 0.2638     | 0.0313     | 0.742 |      |
| 20221024a19        | 79-2-05 | 0.10  | 0.04 | 0.10 | 37.2023    | 3.5107     | 0.3326     | 0.0254     | 0.784 |      |
| 20221024a20        | 79-2-06 | 0.03  | 0.00 | 0.02 | 87.1214    | 13.9782    | 0.7212     | 0.0838     | 0.712 |      |
| 20221024a21        | 79-2-07 | 0.10  | 0.03 | 0.11 | 35.5955    | 2.9110     | 0.3174     | 0.0171     | 0.586 |      |
| 20221024a22        | 79-2-08 | 0.15  | 0.05 | 0.19 | 31.9825    | 2.6228     | 0.2904     | 0.0159     | 0.599 |      |
| 20221024a23        | 79-2-09 | 0.08  | 0.01 | 0.07 | 44.3276    | 3.7215     | 0.3836     | 0.0282     | 0.856 |      |
| 20221024a24        | 79-2-10 | 0.07  | 0.02 | 0.07 | 34.1561    | 2.9034     | 0.3060     | 0.0211     | 0.779 |      |
| 20221024a25        | 79-2-11 | 0.16  | 0.07 | 0.22 | 30.6745    | 2.5471     | 0.2838     | 0.0174     | 0.686 |      |
| 20221024a26        | 79-2-12 | 0.14  | 0.03 | 0.12 | 43.6229    | 3.7015     | 0.3890     | 0.0247     | 0.705 |      |
| 20221024a27        | 79-2-13 | 0.14  | 0.01 | 0.13 | 46.8069    | 6.1182     | 0.4092     | 0.0449     | 0.829 |      |
| 20221024a28        | 79-2-14 | 0.18  | 0.03 | 0.31 | 22.0302    | 1.5110     | 0.2080     | 0.0097     | 0.574 |      |
| 20221024a29        | 79-2-15 | 0.12  | 0.03 | 0.18 | 22.6211    | 1.5947     | 0.2101     | 0.0110     | 0.669 |      |
| 20221024a30        | 79-2-16 | 0.23  | 0.01 | 0.30 | 31.1168    | 2.1962     | 0.2862     | 0.0173     | 0.821 |      |
| 20221024a31        | 79-2-17 | 0.09  | 0.00 | 0.03 | 121.6084   | 14.7009    | 1.0097     | 0.1221     | 1.000 |      |
| 20221024a46        | 79-2-18 | 0.13  | 0.03 | 0.21 | 22.4142    | 1.4997     | 0.2124     | 0.0134     | 0.928 |      |
| 20221024a47        | 79-2-19 | 0.13  | 0.02 | 0.09 | 55.3226    | 4.4975     | 0.4804     | 0.0346     | 0.867 |      |
| 20221024a48        | 79-2-20 | 0.19  | 0.03 | 0.17 | 47.1599    | 3.6821     | 0.4041     | 0.0257     | 0.778 |      |
| 20221024a49        | 79-2-21 | 0.14  | 0.01 | 0.09 | 81.5536    | 11.0928    | 0.6831     | 0.0825     | 0.882 |      |
| 20221024a50        | 79-2-22 | 0.23  | 0.00 | 0.08 | 115.1251   | 7.8441     | 0.9496     | 0.0514     | 0.733 |      |
| 20221024a51        | 79-2-23 | 0.09  | 0.11 | 0.35 | 8.1680     | 0.6685     | 0.1011     | 0.0072     | 0.846 |      |
| 20221024a52        | 79-2-24 | 0.15  | 1.18 | 0.22 | 26.0715    | 2.4987     | 0.2470     | 0.0262     | 0.999 |      |
| 20221024a53        | 79-2-25 | 0.07  | 0.34 | 0.14 | 16.4872    | 1.4773     | 0.1655     | 0.0124     | 0.815 |      |
| 20221024a54        | 79-2-26 | 0.31  | 2.05 | 0.58 | 18.2792    | 1.4672     | 0.1780     | 0.0113     | 0.749 |      |
| 20221024a55        | 79-2-27 | 0.14  | 0.06 | 0.08 | 49.1084    | 8.2849     | 0.4399     | 0.0841     | 0.999 |      |
| 20221024a56        | 79-2-28 | 0.05  | 0.08 | 0.01 | 100.3928   | 17.6969    | 0.8697     | 0.2567     | 0.999 |      |
| 20221024a57        | 79-2-29 | 0.03  | 0.01 | 0.02 | 70.6069    | 19.4717    | 0.6115     | 0.1325     | 0.783 |      |
| 20221024a58        | 79-2-30 | 0.03  | 0.19 | 0.03 | 29.4074    | 4.0994     | 0.2752     | 0.0488     | 0.999 |      |
| 20221024a59        | 79-2-31 | 0.22  | 1.20 | 0.29 | 27.5963    | 2.2136     | 0.2524     | 0.0194     | 0.952 |      |
| 20221024a60        | 79-2-32 | 0.21  | 0.08 | 0.15 | 38.1307    | 3.1582     | 0.3422     | 0.0240     | 0.822 |      |
| 20221024a75        | 79-2-33 | 0.08  | 0.03 | 0.07 | 44.9443    | 5.3502     | 0.4060     | 0.0427     | 0.876 |      |
| 20221024a76        | 79-2-34 | 0.09  | 0.04 | 0.11 | 34.0047    | 3.9582     | 0.3132     | 0.0415     | 0.999 |      |
| 20221024a77        | 79-2-35 | 0.09  | 0.06 | 0.11 | 28.5006    | 2.6142     | 0.2642     | 0.0200     | 0.801 |      |
| 20221024a78        | 79-2-36 | 0.04  | 0.01 | 0.05 | 26.0885    | 3.4869     | 0.2446     | 0.0331     | 0.999 |      |
| 20221024a79        | 79-2-37 | 0.03  | 0.01 | 0.02 | 56.5554    | 7.2946     | 0.4940     | 0.0716     | 0.999 |      |

Continued Table S-3

| Sample No.         |           | Pb    | Th   | U    | 207Pb/235U |            | 206Pb/238U |            | rho   | Note |
|--------------------|-----------|-------|------|------|------------|------------|------------|------------|-------|------|
|                    |           | Total | 232  | 238  | Ratio      | 2 $\sigma$ | Ratio      | 2 $\sigma$ |       |      |
|                    |           | ppm   | ppm  | ppm  |            |            |            |            |       |      |
| 60 $\mu$ m-4J-10Hz |           |       |      |      |            |            |            |            |       |      |
| 20221024a80        | 79-2-38   | 0.04  | 0.03 | 0.04 | 34.2534    | 3.8606     | 0.3152     | 0.0386     | 0.999 |      |
| 20221024a81        | 79-2-39   | 0.12  | 0.02 | 0.03 | 74.7961    | 10.1630    | 0.6443     | 0.0778     | 0.882 |      |
| 20221024a82        | 79-2-40   | 0.04  | 0.05 | 0.02 | 96.7510    | 15.4407    | 0.8208     | 0.1202     | 0.914 |      |
| 20221024a83        | 79-2-41   | 0.07  | 0.01 | 0.03 | 84.6523    | 7.9850     | 0.7230     | 0.0631     | 0.916 |      |
| 20221024a84        | 79-2-42   | 0.07  | 0.04 | 0.11 | 22.5720    | 2.3934     | 0.2178     | 0.0215     | 0.925 |      |
| 20221024a85        | 79-2-43   | 0.11  | 0.03 | 0.12 | 31.9776    | 2.9123     | 0.2919     | 0.0225     | 0.825 |      |
| 20221024a86        | 79-2-44   | 0.14  | 0.04 | 0.10 | 38.5536    | 7.4109     | 0.3438     | 0.0531     | 0.798 |      |
| 20221024a87        | 79-2-45   | 0.07  | 0.63 | 0.04 | 49.8169    | 5.3788     | 0.4316     | 0.0426     | 0.907 |      |
| 20221024a88        | 79-2-46   | 0.10  | 0.02 | 0.08 | 47.8598    | 4.8194     | 0.4318     | 0.0410     | 0.938 |      |
| 20221024a89        | 79-2-47   | 0.06  | 0.04 | 0.08 | 27.7635    | 3.3200     | 0.2612     | 0.0302     | 0.964 |      |
| 20221024a106       | 79-2-48   | 0.24  | 0.03 | 0.18 | 41.1791    | 2.5522     | 0.3704     | 0.0214     | 0.908 |      |
| 20221024a107       | 79-2-49   | 0.07  | 0.01 | 0.03 | 75.0994    | 6.3446     | 0.6477     | 0.0608     | 0.999 |      |
| 20221024a108       | 79-2-50   | 0.07  | 0.02 | 0.06 | 34.2980    | 2.6091     | 0.3127     | 0.0233     | 0.976 |      |
| 20221024a109       | 79-2-51   | 0.08  | 0.00 | 0.03 | 89.9746    | 9.4611     | 0.7678     | 0.0690     | 0.840 |      |
| 20221024a110       | 79-2-52   | 0.14  | 0.00 | 0.01 | 726.0234   | 160.0890   | 5.8807     | 1.1795     | 0.908 |      |
| 20221024a111       | 79-2-53   | 0.05  | 0.00 | 0.01 | 205.3329   | 34.7643    | 1.7182     | 0.2997     | 0.999 |      |
| 20221024a112       | 79-2-54   | 0.13  | 0.02 | 0.11 | 44.2645    | 3.1725     | 0.3941     | 0.0245     | 0.837 |      |
| 20221024a113       | 79-2-55   | 0.04  | 0.01 | 0.03 | 58.9090    | 7.2126     | 0.5217     | 0.0708     | 0.999 |      |
| 20221024a114       | 79-2-56   | 0.05  | 0.02 | 0.29 | 6.1478     | 0.5936     | 0.0879     | 0.0070     | 0.800 |      |
| 20221024a115       | 79-2-57   | 0.01  | 0.00 | 0.03 | 9.2873     | 1.8329     | 0.1118     | 0.0198     | 0.894 |      |
| 20221024a116       | 79-2-58   | 0.12  | 0.04 | 0.44 | 12.1253    | 1.0705     | 0.1351     | 0.0099     | 0.809 |      |
| 20221024a117       | 79-2-59   | 0.14  | 0.04 | 0.22 | 24.7166    | 2.2621     | 0.2352     | 0.0161     | 0.713 |      |
| 20221024a118       | 79-2-60   | 0.07  | 0.02 | 0.48 | 4.8104     | 0.4619     | 0.0741     | 0.0046     | 0.601 |      |
| 20221024a119       | 79-2-61   | 0.10  | 0.01 | 0.38 | 8.9255     | 0.6935     | 0.1084     | 0.0069     | 0.778 |      |
| 20221024a120       | 79-2-62   | 0.04  | 0.02 | 0.12 | 9.0737     | 0.8301     | 0.1109     | 0.0096     | 0.942 |      |
| 20221024a121       | 79-2-63   | 0.08  | 0.02 | 0.28 | 9.8005     | 0.7977     | 0.1165     | 0.0078     | 0.784 |      |
| 60 $\mu$ m-8J-10Hz |           |       |      |      |            |            |            |            |       |      |
| 20230330a13        | 79-MGT-07 | 0.42  | 0.06 | 0.05 | 301.8566   | 66.9862    | 2.8018     | 0.4745     | 0.762 |      |
| 20230330a57        | 79-MGT-36 | 1.15  | 0.01 | 0.14 | 310.0090   | 35.9832    | 2.5528     | 0.2694     | 0.908 |      |
| 20230330a11        | 79-MGT-05 | 0.32  | 0.03 | 0.06 | 138.8317   | 18.3298    | 1.1554     | 0.1136     | 0.741 |      |
| 20230330a16        | 79-MGT-10 | 0.04  | 0.01 | 0.03 | 93.4503    | 40.8987    | 0.9434     | 0.3880     | 0.940 |      |
| 20230330a21        | 79-MGT-15 | 0.35  | 0.08 | 0.15 | 73.7619    | 9.8375     | 0.6890     | 0.0497     | 0.532 |      |
| 20230330a15        | 79-MGT-09 | 0.08  | 0.02 | 0.04 | 60.4436    | 9.8571     | 0.5842     | 0.0787     | 0.825 |      |
| 20230330a10        | 79-MGT-04 | 0.15  | 0.02 | 0.09 | 54.1561    | 9.8512     | 0.4920     | 0.0709     | 0.790 |      |
| 20230330a19        | 79-MGT-13 | 0.11  | 0.05 | 0.07 | 51.6551    | 7.4531     | 0.4728     | 0.0464     | 0.675 |      |
| 20230330a30        | 79-MGT-16 | 0.10  | 0.01 | 0.05 | 48.2850    | 6.7550     | 0.4280     | 0.0449     | 0.746 |      |
| 20230330a32        | 79-MGT-18 | 0.30  | 0.09 | 0.23 | 43.2834    | 10.0223    | 0.4021     | 0.0729     | 0.782 |      |

Continued Table S-3

| Sample No.         |           | Pb    | Th   | U    | 207Pb/235U |            | 206Pb/238U |            | rho   | Note |
|--------------------|-----------|-------|------|------|------------|------------|------------|------------|-------|------|
|                    |           | Total | 232  | 238  | Ratio      | 2 $\sigma$ | Ratio      | 2 $\sigma$ |       |      |
|                    |           | ppm   | ppm  | ppm  |            |            |            |            |       |      |
| 60 $\mu$ m-8J-10Hz |           |       |      |      |            |            |            |            |       |      |
| 20230330a14        | 79-MGT-08 | 0.41  | 0.69 | 0.27 | 40.1140    | 5.7222     | 0.3781     | 0.0399     | 0.735 |      |
| 20230330a40        | 79-MGT-26 | 0.18  | 0.00 | 0.13 | 37.8968    | 4.0091     | 0.3422     | 0.0267     | 0.731 |      |
| 20230330a37        | 79-MGT-23 | 0.08  | 0.00 | 0.08 | 35.5702    | 3.8558     | 0.3322     | 0.0339     | 0.940 |      |
| 20230330a55        | 79-MGT-34 | 0.39  | 0.05 | 0.36 | 35.7859    | 2.5256     | 0.3278     | 0.0143     | 0.595 |      |
| 20230330a31        | 79-MGT-17 | 0.10  | 0.02 | 0.11 | 31.3657    | 4.1057     | 0.3057     | 0.0272     | 0.675 |      |
| 20230330a66        | 79-MGT-45 | 0.27  | 0.44 | 0.33 | 26.4621    | 3.5988     | 0.2508     | 0.0290     | 0.847 |      |
| 20230330a34        | 79-MGT-20 | 0.08  | 0.04 | 0.13 | 19.4513    | 2.1173     | 0.1982     | 0.0176     | 0.813 |      |
| 20230330a59        | 79-MGT-38 | 0.13  | 0.03 | 0.23 | 17.3933    | 1.1626     | 0.1869     | 0.0100     | 0.784 |      |
| 20230330a61        | 79-MGT-40 | 0.08  | 0.01 | 0.14 | 18.3017    | 1.9081     | 0.1866     | 0.0197     | 0.990 |      |
| 20230330a33        | 79-MGT-19 | 0.16  | 0.05 | 0.30 | 17.5619    | 2.0364     | 0.1749     | 0.0132     | 0.644 |      |
| 20230330a53        | 79-MGT-32 | 0.08  | 0.01 | 0.16 | 16.0971    | 1.5313     | 0.1651     | 0.0125     | 0.789 |      |
| 20230330a38        | 79-MGT-24 | 0.15  | 0.03 | 0.34 | 15.0769    | 1.3795     | 0.1552     | 0.0078     | 0.528 |      |
| 20230330a58        | 79-MGT-37 | 0.17  | 0.02 | 0.33 | 14.0456    | 1.0782     | 0.1432     | 0.0073     | 0.648 |      |
| 20230330a12        | 79-MGT-06 | 0.07  | 0.15 | 0.16 | 12.0776    | 1.3328     | 0.1315     | 0.0081     | 0.545 |      |
| 20230330a7         | 79-MGT-01 | 0.05  | 0.16 | 0.11 | 11.6333    | 1.3798     | 0.1294     | 0.0089     | 0.572 |      |
| 20230330a62        | 79-MGT-41 | 0.07  | 1.69 | 0.57 | 10.2830    | 3.5516     | 0.1178     | 0.0272     | 0.669 |      |
| 20230330a8         | 79-MGT-02 | 0.01  | 0.02 | 0.02 | 10.1117    | 2.8376     | 0.1158     | 0.0317     | 0.974 |      |
| 20230330a54        | 79-MGT-33 | 0.12  | 0.04 | 0.41 | 9.1434     | 0.7111     | 0.1081     | 0.0047     | 0.532 |      |
| 20230330a42        | 79-MGT-28 | 0.08  | 0.01 | 0.25 | 9.0665     | 0.8635     | 0.1025     | 0.0052     | 0.516 |      |
| 20230330a44        | 79-MGT-30 | 0.13  | 0.03 | 0.52 | 7.8375     | 0.9179     | 0.0956     | 0.0073     | 0.640 |      |
| 20230330a60        | 79-MGT-39 | 0.09  | 0.02 | 0.39 | 7.3921     | 0.5382     | 0.0896     | 0.0044     | 0.648 |      |
| 20230330a41        | 79-MGT-27 | 0.08  | 0.03 | 0.33 | 7.3395     | 0.6461     | 0.0870     | 0.0059     | 0.766 |      |
| 20230330a52        | 79-MGT-31 | 0.03  | 0.01 | 0.15 | 6.6094     | 0.9577     | 0.0804     | 0.0074     | 0.626 |      |
| 20230330a56        | 79-MGT-35 | 0.07  | 0.01 | 0.41 | 4.4978     | 0.4358     | 0.0664     | 0.0034     | 0.519 |      |
| 20230330a63        | 79-MGT-42 | 0.08  | 0.03 | 0.37 | 3.7367     | 0.2871     | 0.0585     | 0.0032     | 0.700 |      |
| 20230330a64        | 79-MGT-43 | 0.11  | 0.03 | 0.99 | 3.4412     | 0.4748     | 0.0560     | 0.0035     | 0.442 |      |
| 20230330a43        | 79-MGT-29 | 0.04  | 0.01 | 0.35 | 3.0512     | 0.3186     | 0.0506     | 0.0035     | 0.662 |      |
| 20230330a65        | 79-MGT-44 | 0.10  | 0.05 | 1.11 | 2.0956     | 0.1247     | 0.0454     | 0.0016     | 0.566 |      |

Note: a small number of data were abnormal and deleted due to containing low Pb contents beyond the detection limit.
